# Supplementary material
Source: PubMed Central journal article supplement (PMC4314233)
Supplement: supp_fj.14-255414_Supplemental_Figure1.pdf [file supp_fj.14-255414_Supplemental_Figure1.pdf]

## SUPPLEMENTAL FIGURE 1

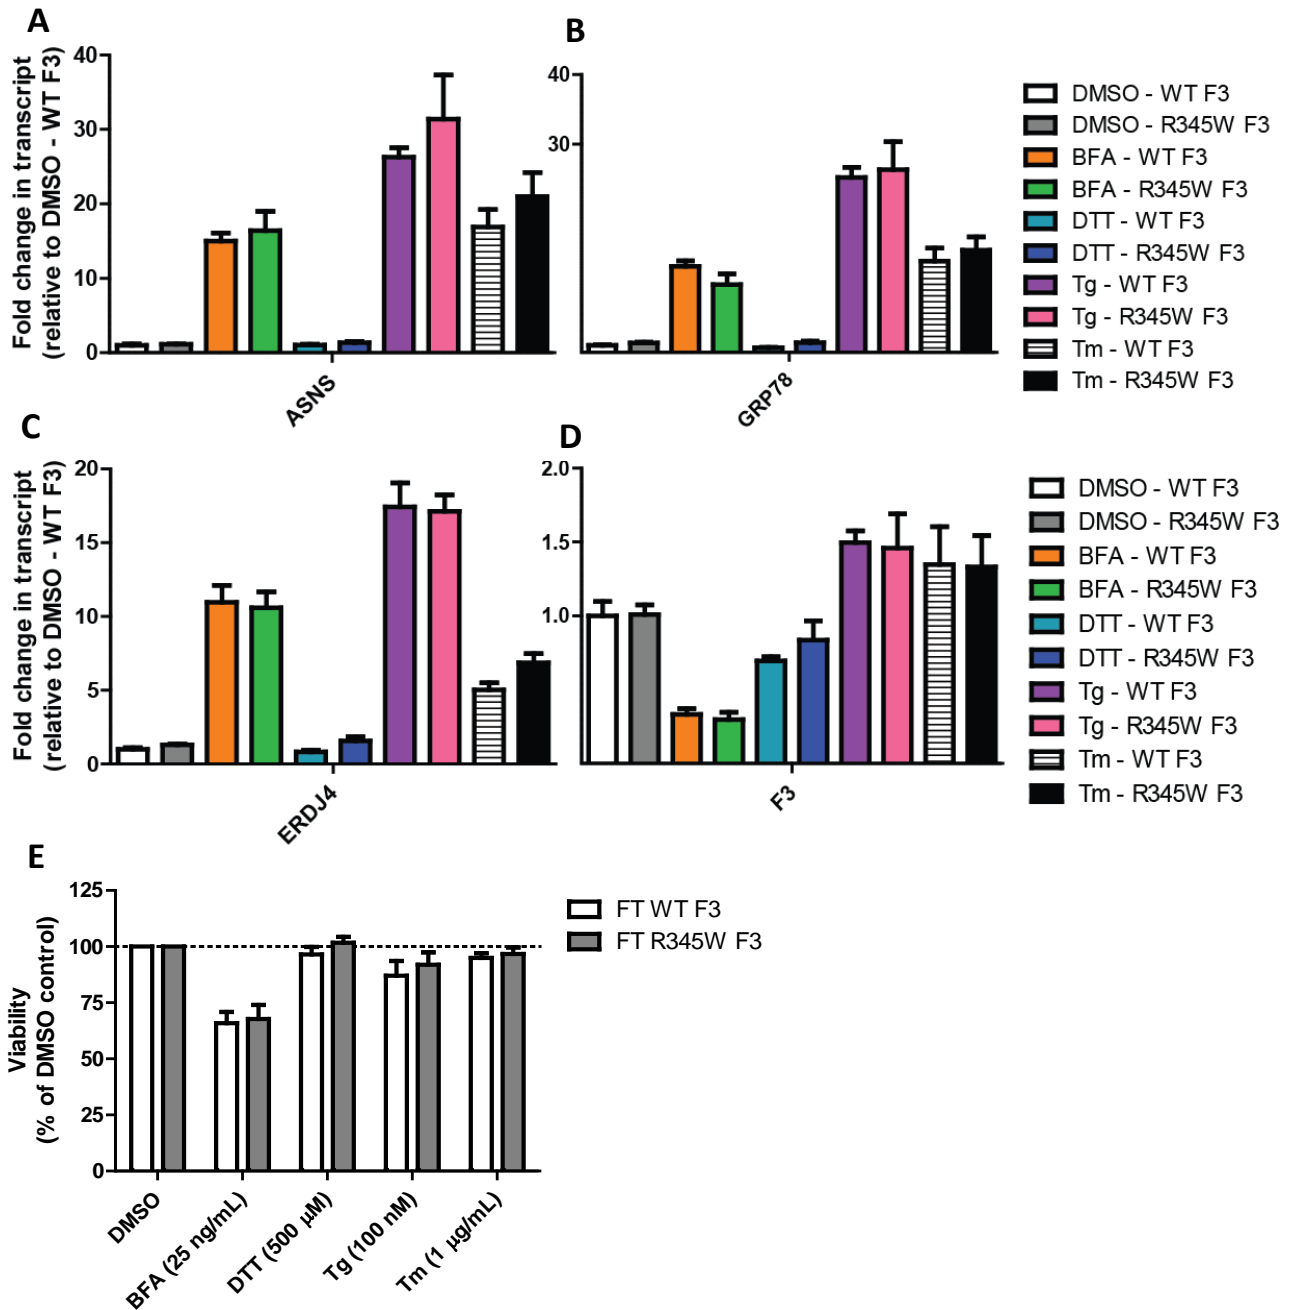

Supplemental Figure 1. qPCR analysis and viability ARPE-19 cells post ER stressor treatment. (A-D) ARPE-19 cells were infected with adenovirus at an MOI of 5 for 48 h, followed by treatment with the ER stressors as described in Figs. 1 and 2. After 24 h of treatment, cells were harvested, and RNA was extracted followed by qPCR. Transcripts were normalized to the housekeeping gene, RPLP2 and are presented as levels relative to transcripts from DMSO-treated WT F3-expressing cells. Representative data (average  $\pm$  the 95% confidence interval),  $n = 3$ . (E) 24 h post ER stressor treatment, ARPE-19 cell viability was measured by the resazurin mitochondrial reduction potential [13],  $n \geq 5$ .
