# Supplementary material
Source: PubMed Central journal article supplement (PMC4314233)
Supplement: supp_fj.14-255414_Supplemental_Figure3.pdf [file supp_fj.14-255414_Supplemental_Figure3.pdf]

### SUPPLEMENTAL FIGURE 3

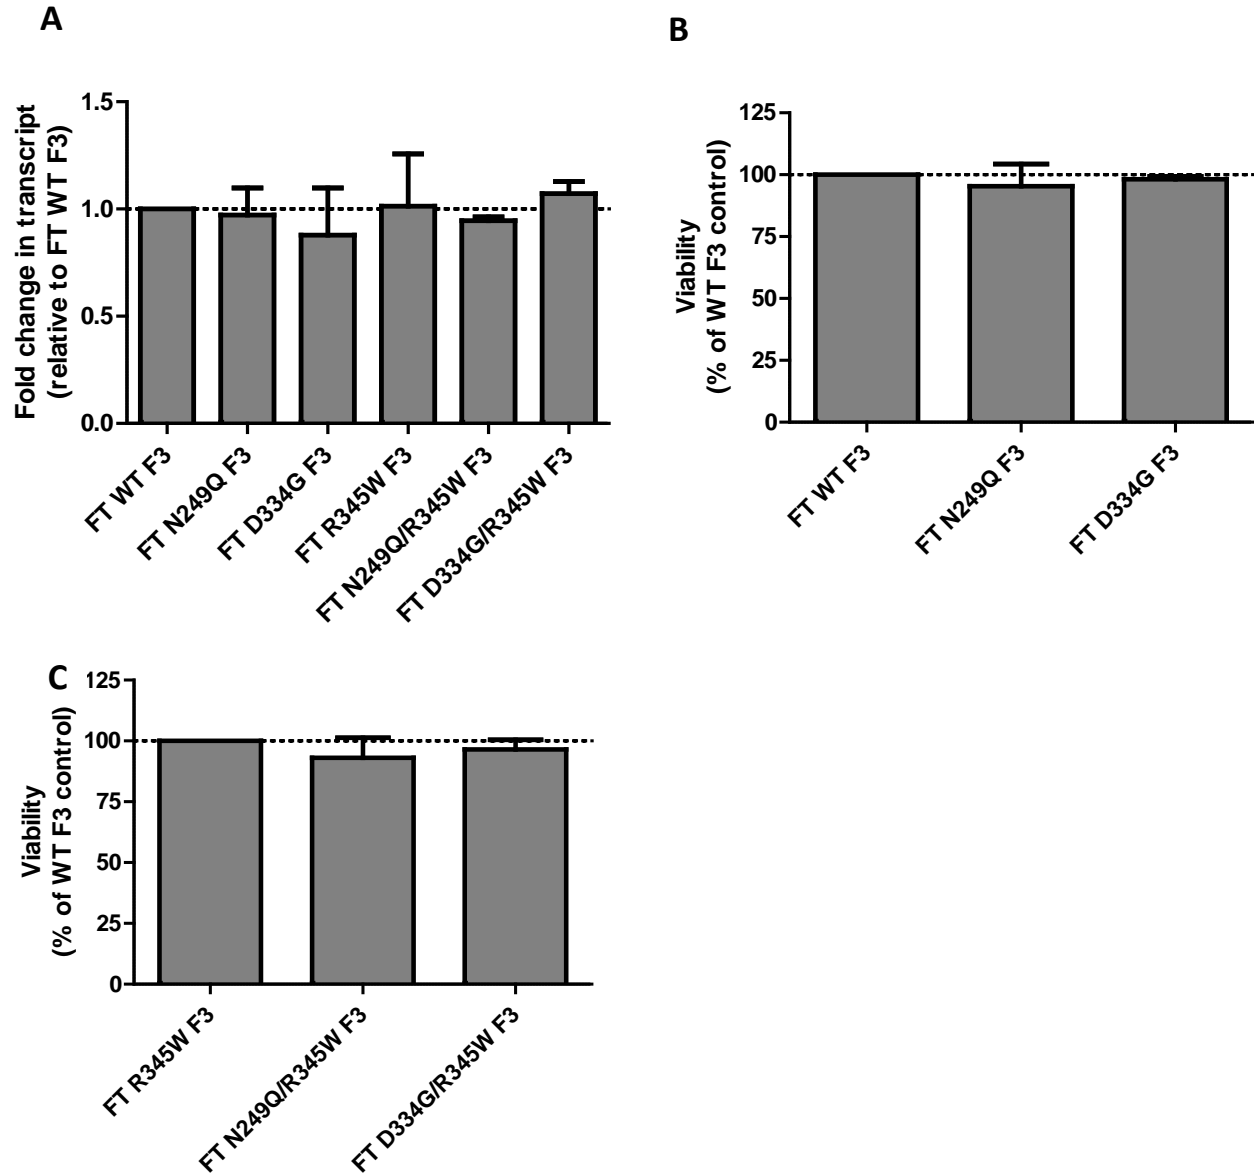

Supplemental Figure 3. Verification of F3 expression levels and lack of toxicity. (A) F3 transcript levels from the ARPE-19 cells used in Fig. 4 were assessed by qPCR. Data shown are a combination of three independent experiments (average  $\pm$  SD) and are presented as levels relative to WT F3. (B, C) ARPE-19 cells were infected for 48 h at an MOI of 5, then media was replaced with fresh complete media for an additional 24 h. Viability was measured by the resazurin mitochondrial reduction potential assay. Media containing the ER stressors was removed, cells were then washed once with DPBS followed by treatment with 50  $\mu$ M resazurin (in complete media) for 1 h. The fluorescence intensity, which is proportional to cell viability was read at 530 nm (ex) and 590 nm (em).  $n \geq 3$  independent experiments.
